# Supplementary material for: A polymorphic SrGa2O4:Eu2+ red phosphor for warm illumination and operando visualization of H2O2 catalytic reaction
Source: Royal Society of Chemistry journal article supplement (doi:10.1039/d4tc03523b), 2024-01-01
Supplement: d4tc03523b1.pdf [file d4tc03523b1.pdf]

## Supporting Information

### **A polymorphic SrGa<sub>2</sub>O<sub>4</sub>:Eu<sup>2+</sup> red phosphor for warm illumination and operando visualization of H<sub>2</sub>O<sub>2</sub> catalytic reaction**

Tao Hu<sup>a,c\*</sup>, Zelong Jiang<sup>a,b</sup>, Hong Yang<sup>a</sup>, Wei Lv<sup>a</sup>, Ruijing Fu<sup>a,c</sup>, Qingguang Zeng<sup>a,c</sup>, Xiaodong Yi<sup>d</sup>, Yan Gao<sup>a\*</sup>

<sup>a</sup>School of Applied Physics and Materials, Wuyi University, Jiangmen 529020, Guangdong Province, P. R. China.

<sup>b</sup>2495 Advanced Ceramic Materials (Guangdong) Co., LTD. Foshan 528137, Guangdong Province, P. R. China.

<sup>c</sup>Institute of Carbon Peaking and Carbon Neutralization, Wuyi University, Jiangmen 529020, Guangdong Province, P. R. China.

<sup>d</sup>CAS Key Laboratory of Design and Assembly of Functional Nanostructures, and Fujian Key Laboratory of Nanomaterials, Fujian Institute of Research on the Structure of Matter Chinese Academy of Sciences Fuzhou, Fujian 350002, China

E-mail: [hutaowyu@sina.com](mailto:hutaowyu@sina.com); [gaoyan\\_chn@sina.com](mailto:gaoyan_chn@sina.com)

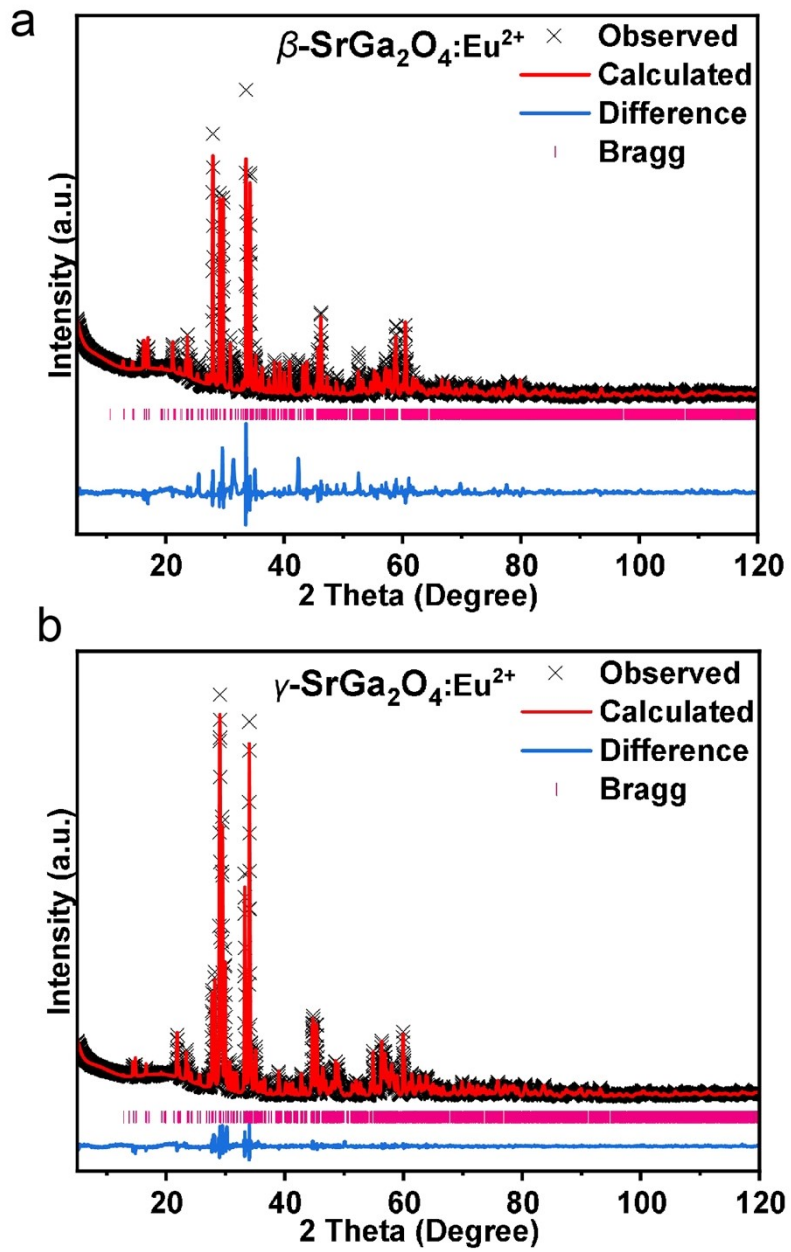

Figure S1 XRD refinements on the (a)  $\beta\text{-SrGa}_2\text{O}_4:\text{Eu}^{2+}$  synthesized at 1000 °C and (b)  $\gamma\text{-SrGa}_2\text{O}_4:\text{Eu}^{2+}$  synthesized at 1200 °C

Table S1 The refined structure parameters of  $\beta$ -SrGa<sub>2</sub>O<sub>4</sub>:Eu<sup>2+</sup> and  $\gamma$ -SrGa<sub>2</sub>O<sub>4</sub>:Eu<sup>2+</sup> red phosphor

| Sample                                                       | Space group | Cell parameters( $\text{\AA}$ , $^\circ$ ), | $R_p$ (%),   |
|--------------------------------------------------------------|-------------|---------------------------------------------|--------------|
|                                                              |             | Cell volume( $\text{\AA}^3$ )               | $R_{wp}$ (%) |
| $\gamma$ -SrGa <sub>2</sub> O <sub>4</sub> :Eu <sup>2+</sup> | P21/n       | $a = 8.10924$                               |              |
|                                                              |             | $b = 10.75332$                              |              |
|                                                              |             | $c = 9.04985$                               | 5.60         |
|                                                              |             | $V = 788.872717$                            | 3.94         |
|                                                              |             | $\alpha = \gamma = 90$                      |              |
|                                                              |             | $\beta = 91.5413$                           |              |
| $\beta$ -SrGa <sub>2</sub> O <sub>4</sub> :Eu <sup>2+</sup>  | P21/c       | $a = 8.38204$                               |              |
|                                                              |             | $b = 8.99710$                               |              |
|                                                              |             | $c = 10.68064$                              | 12.76        |
|                                                              |             | $V = 803.597830$                            | 7.87         |
|                                                              |             | $\alpha = \gamma = 90$                      |              |
|                                                              |             | $\beta = 93.9076$                           |              |

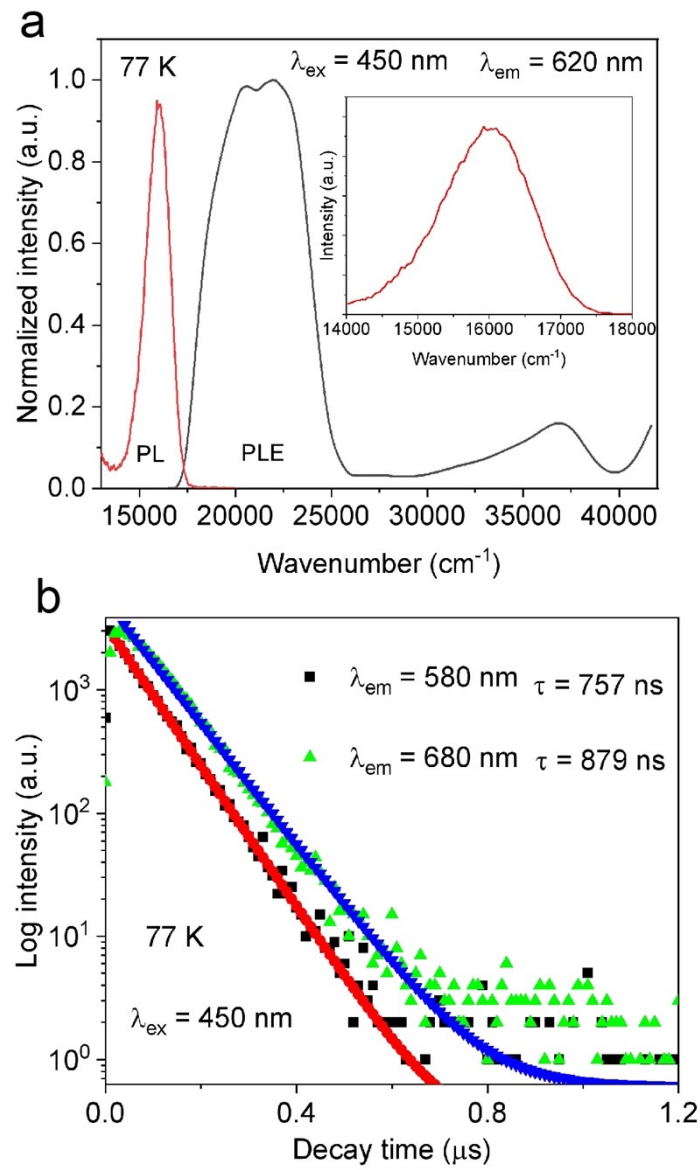

Figure S2 (a) PLE and PL spectra of  $\beta$ -SrGa<sub>2</sub>O<sub>4</sub>:Eu<sup>2+</sup> phosphor measured at temperature 77 K, the inset gives the enlarge view of the PL spectra. (b) low temperature PL decay curves of  $\beta$ -SrGa<sub>2</sub>O<sub>4</sub>:Eu<sup>2+</sup> phosphor by monitoring 580 nm and 680 nm emission

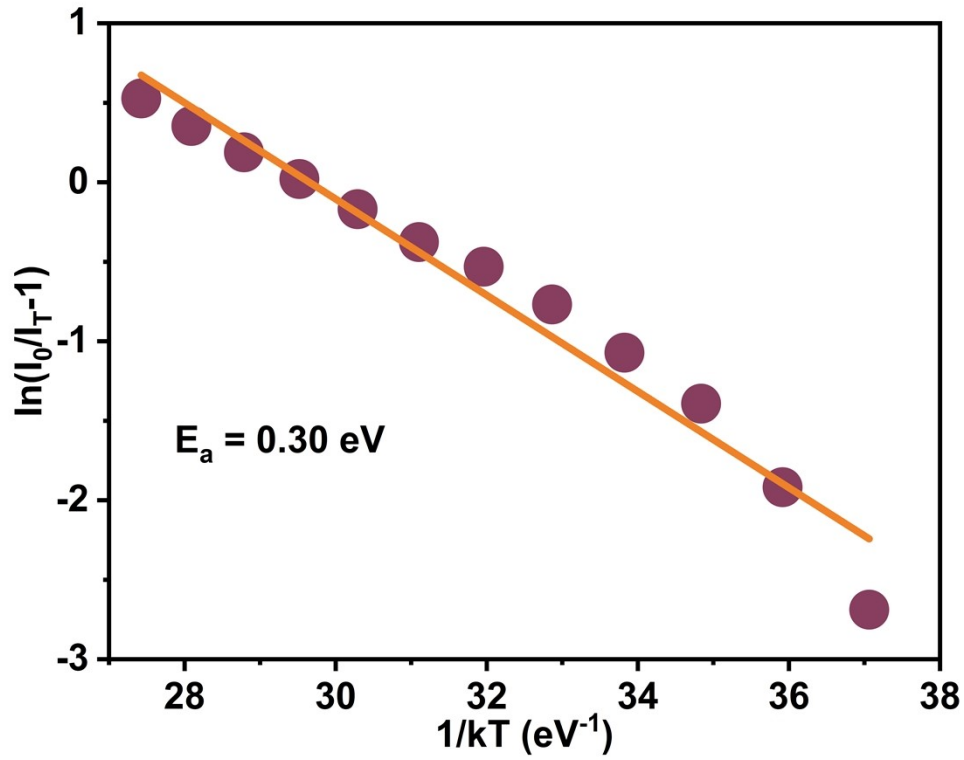

Figure S3 The fitted activation energy for the thermal quenching of  $\beta$ -SrGa<sub>2</sub>O<sub>4</sub>:Eu<sup>2+</sup> red phosphor.

The activation energy  $\Delta E_a$  for the thermal quenching of the Eu<sup>2+</sup> emission was calculated by the following Arrhenius equation:

$$I_T / I_0 = \frac{1}{1 + A \exp\left(-\frac{\Delta E_a}{kT}\right)}$$

Where  $I_0$  is the initial intensity,  $I_T$  is the intensity at given temperature  $T$ ,  $A$  is constant, and  $k$  is the Boltzmann constant ( $8.62 \times 10^{-5}$  eV/K). The thermal activation energy  $\Delta E_a$  for the  $\beta$ -SrGa<sub>2</sub>O<sub>4</sub>:Eu<sup>2+</sup> red phosphor was calculated to be 0.30 eV.

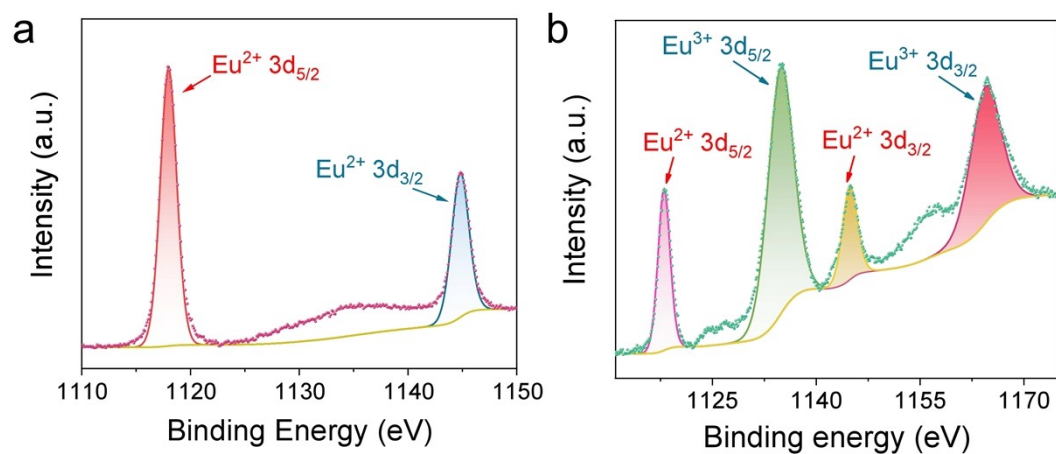

Figure S4 High-resolution Eu 3d XPS spectra of (a)  $\beta$ -SrGa<sub>2</sub>O<sub>4</sub>:Eu<sup>2+</sup> phosphor, and (b) the compound collected after immersing  $\beta$ -SrGa<sub>2</sub>O<sub>4</sub>:Eu<sup>2+</sup> phosphor in MnO<sub>2</sub>@H<sub>2</sub>O<sub>2</sub> solution for 3h.
